# Supplementary material for: Boosting propane dehydroaromatization by confining PtZn alloy nanoparticles within H-ZSM-5 crystals
Source: Royal Society of Chemistry journal article supplement (doi:10.1039/d2cy01096h), 2022-01-01
Supplement: d2cy01096h1.pdf [file d2cy01096h1.pdf]

## Electronic supplementary material

### **Boosting propane dehydroaromatization by confining PtZn alloy nanoparticles within H-ZSM-5 crystals**

**Hui Chen,<sup>‡a</sup> Wei Li,<sup>‡a</sup> Mingchao Zhang,<sup>a</sup> Wangyang Wang,<sup>a</sup> Xian-hua Zhang,<sup>a</sup> Fa Lu,<sup>a</sup> Kang Cheng,<sup>\*ab</sup> Qinghong Zhang<sup>\*a</sup> and Ye Wang<sup>ab</sup>**

<sup>a</sup> *State Key Laboratory of Physical Chemistry of Solid Surfaces, Collaborative Innovation Center of Chemistry for Energy Materials, College of Chemistry and Chemical Engineering, Xiamen 361005, China*

<sup>b</sup> *Innovation Laboratory for Sciences and Technologies of Energy Materials of Fujian Province (IKKEM), Xiamen 361005, China*

<sup>‡</sup> These authors contributed equally to this work.

\* Corresponding authors: [kangcheng@xmu.edu.cn](mailto:kangcheng@xmu.edu.cn) and [zhangqh@xmu.edu.cn](mailto:zhangqh@xmu.edu.cn)

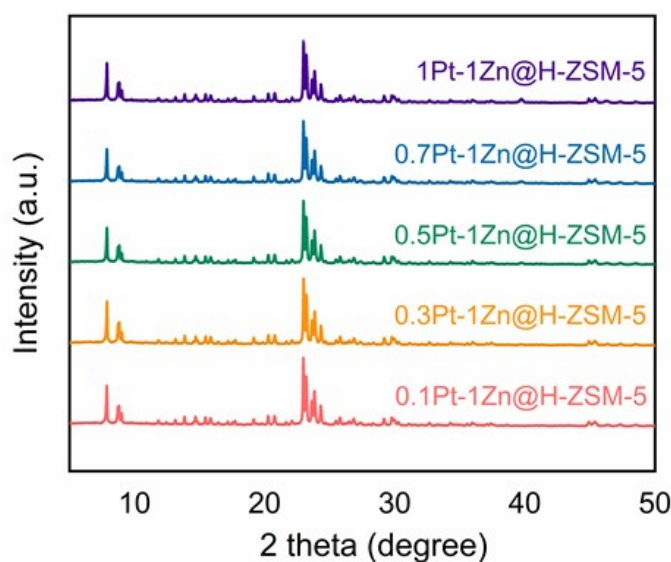

**Fig. S1.** XRD patterns of bifunctional  $x\text{Pt-1Zn@H-ZSM-5}$  catalysts

**Table S1** Textural properties of H-ZSM-5,  $\gamma\text{Zn@H-ZSM-5}$ , and  $x\text{Pt-}\gamma\text{Zn @H-ZSM-5}$  catalysts.

| Catalyst          | Si/Al <sup>a</sup><br>ratio | $S_{\text{BET}}^{\text{b}}$<br>( $\text{m}^2 \text{g}^{-1}$ ) | $S_{\text{micro}}^{\text{c}}$<br>( $\text{m}^2 \text{g}^{-1}$ ) | $V_{\text{total}}^{\text{d}}$<br>( $\text{cm}^3 \text{g}^{-1}$ ) | $V_{\text{micro}}^{\text{e}}$<br>( $\text{cm}^3 \text{g}^{-1}$ ) | Crystal sizes <sup>f</sup><br>( $\mu\text{m}$ ) |
|-------------------|-----------------------------|---------------------------------------------------------------|-----------------------------------------------------------------|------------------------------------------------------------------|------------------------------------------------------------------|-------------------------------------------------|
| H-ZSM-5           | 15                          | 363                                                           | 253                                                             | 0.20                                                             | 0.11                                                             | 1–2                                             |
| H-ZSM-5           | 35                          | 354                                                           | 252                                                             | 0.18                                                             | 0.10                                                             | 1–2                                             |
| H-ZSM-5           | 60                          | 353                                                           | 267                                                             | 0.23                                                             | 0.11                                                             | 1–2                                             |
| H-ZSM-5           | 120                         | 314                                                           | 262                                                             | 0.24                                                             | 0.10                                                             | 1–2                                             |
| 0.5Zn@H-ZSM-5     | 15                          | 338                                                           | 244                                                             | 0.19                                                             | 0.11                                                             | 1–2                                             |
| 1Zn@H-ZSM-5       | 15                          | 338                                                           | 246                                                             | 0.19                                                             | 0.11                                                             | 1–2                                             |
| 2Zn@H-ZSM-5       | 15                          | 328                                                           | 246                                                             | 0.19                                                             | 0.11                                                             | 1–2                                             |
| 3Zn@H-ZSM-5       | 15                          | 308                                                           | 239                                                             | 0.17                                                             | 0.11                                                             | 1–2                                             |
| 4Zn@H-ZSM-5       | 15                          | 303                                                           | 233                                                             | 0.17                                                             | 0.10                                                             | 1–2                                             |
| 5Zn@H-ZSM-5       | 15                          | 275                                                           | 214                                                             | 0.16                                                             | 0.10                                                             | 1–2                                             |
| 0.7Pt@H-ZSM-5     | 15                          | 323                                                           | 236                                                             | 0.20                                                             | 0.10                                                             | 1–2                                             |
| 0.7Pt-1Zn@H-ZSM-5 | 15                          | 313                                                           | 228                                                             | 0.18                                                             | 0.10                                                             | 1–2                                             |

<sup>a</sup> By X-ray fluorescence spectrometry

<sup>b</sup> BET method

<sup>c</sup> t-plot method

<sup>d</sup> Single point desorption total pore volume,  $P/P_0 = 0.99$

<sup>e</sup> t-plot method

<sup>f</sup> By scanning electron microscopic (SEM)

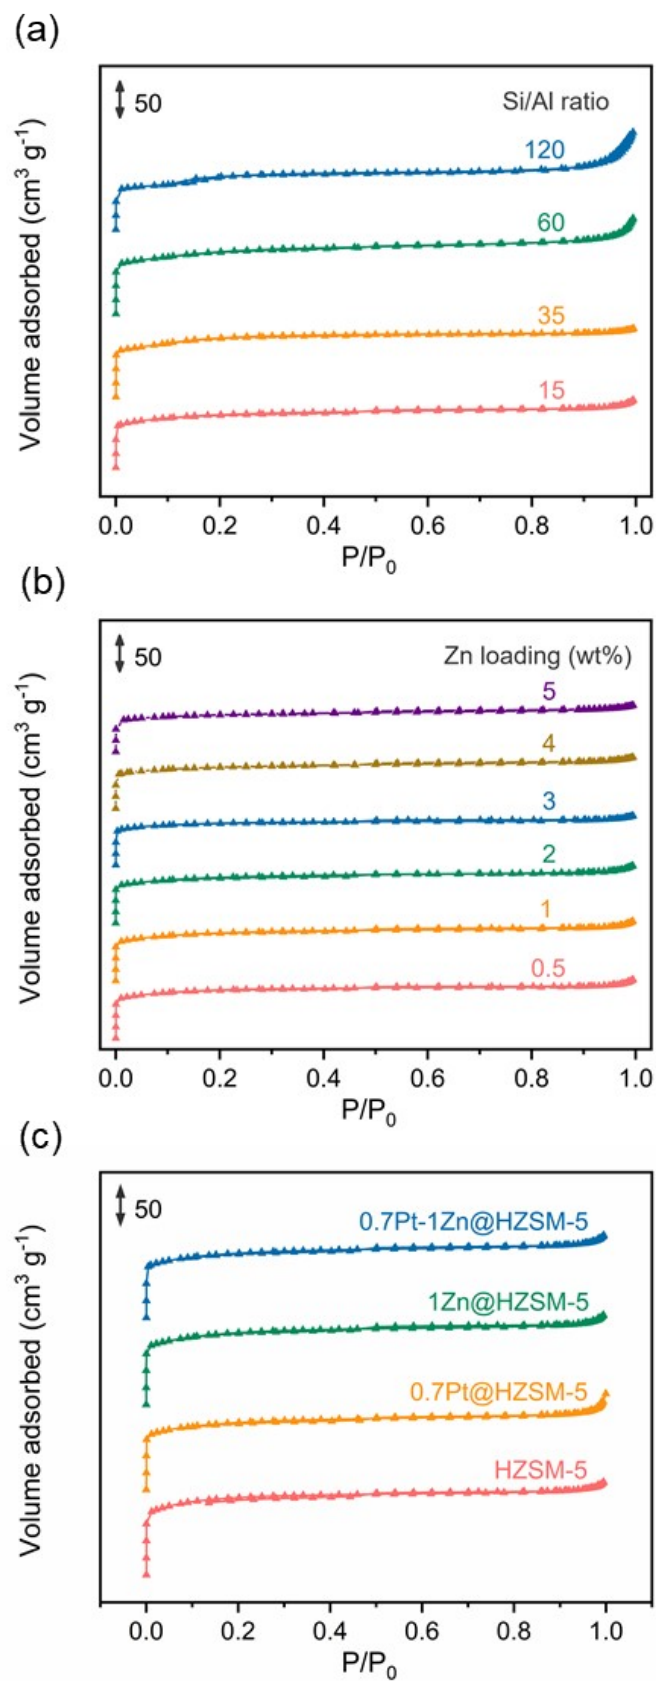

**Fig. S2.**  $N_2$  adsorption-desorption isotherms of (a) H-ZSM-5 with different Si/Al ratios, (b)  $\gamma Zn@H-ZSM-5$ , and (c)  $0.7Pt-1Zn@H-ZSM-5$ .

**Table S2** Acid densities of catalysts estimated by NH<sub>3</sub>-TPD and Pyridine-adsorbed FT-IR.

| Catalyst          | Si/Al ratio | Acidity by NH <sub>3</sub> -TPD ( $\mu\text{mol g}^{-1}$ ) <sup>a</sup> |      |       | Acidity by Py-FTIR ( $\mu\text{mol g}^{-1}$ ) |       |     |
|-------------------|-------------|-------------------------------------------------------------------------|------|-------|-----------------------------------------------|-------|-----|
|                   |             | Strong                                                                  | weak | total | Brønsted                                      | Lewis | B/L |
| H-ZSM-5           | 15          | 357                                                                     | 567  | 924   | 237                                           | 11    | 21  |
| H-ZSM-5           | 35          | 159                                                                     | 224  | 383   | 132                                           | 12    | 11  |
| H-ZSM-5           | 60          | 90                                                                      | 124  | 214   | 61                                            | 19    | 3   |
| H-ZSM-5           | 120         | 51                                                                      | 70   | 121   | 29                                            | 12    | 2   |
| 0.5Zn@H-ZSM-5     | 15          | 319                                                                     | 590  | 909   | 218                                           | 50    | 4.4 |
| 1Zn@H-ZSM-5       | 15          | 295                                                                     | 562  | 857   | 206                                           | 109   | 1.9 |
| 2Zn@H-ZSM-5       | 15          | 217                                                                     | 504  | 721   | 114                                           | 160   | 0.7 |
| 3Zn@H-ZSM-5       | 15          | 182                                                                     | 551  | 733   | 81                                            | 145   | 0.6 |
| 4Zn@H-ZSM-5       | 15          | 157                                                                     | 559  | 716   | 80                                            | 189   | 0.4 |
| 5Zn@H-ZSM-5       | 15          | 139                                                                     | 532  | 671   | 70                                            | 205   | 0.3 |
| 0.7Pt@H-ZSM-5     | 15          | 342                                                                     | 558  | 900   | 223                                           | 33    | 6.8 |
| 0.7Pt-1Zn@H-ZSM-5 | 15          | 311                                                                     | 563  | 874   | 213                                           | 86    | 2.5 |

<sup>a</sup> By deconvolution of NH<sub>3</sub>-TPD profiles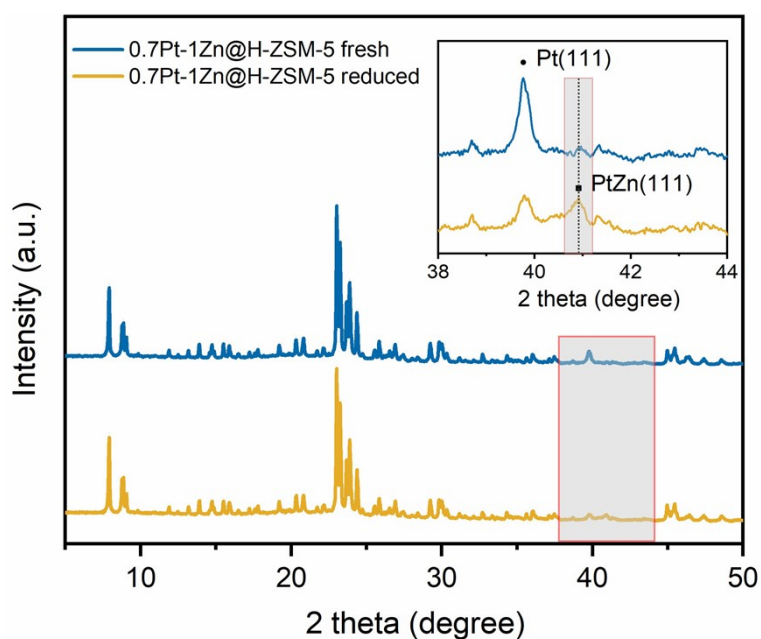**Fig. S3.** XRD profiles for 0.7Pt-1Zn@H-ZSM-5 before and after reduction by H<sub>2</sub> at 550 °C for 2 h.

**Table S3** Catalytic performances of 1Ga/H-ZSM-5 and xPt-1Zn@H-ZSM-5 catalysts.

| Catalyst           | C <sub>3</sub> H <sub>8</sub> conv.<br>(%) | Selectivity(%)  |                               |                               |                               |                 |      | Aro. yield<br>(%) |
|--------------------|--------------------------------------------|-----------------|-------------------------------|-------------------------------|-------------------------------|-----------------|------|-------------------|
|                    |                                            | CH <sub>4</sub> | C <sub>2</sub> H <sub>4</sub> | C <sub>2</sub> H <sub>6</sub> | C <sub>3</sub> H <sub>6</sub> | C <sub>4+</sub> | Aro. |                   |
| 1Ga/H-ZSM-5        | 40                                         | 17.6            | 8.4                           | 8.9                           | 8.3                           | 4.0             | 53   | 21                |
| Ga@H-ZSM-5         | 31                                         | 11              | 7.4                           | 20                            | 15                            | 4.6             | 42   | 13                |
| 1Zn@H-ZSM-5        | 34                                         | 14              | 8.7                           | 9.7                           | 9.6                           | 2.9             | 55   | 19                |
| 0.7Pt@H-ZSM-5      | 81                                         | 8.4             | 1.9                           | 45                            | 6.1                           | 1.9             | 36   | 30                |
| 0.05Pt-1Zn@H-ZSM-5 | 39                                         | 12              | 7                             | 12.7                          | 10                            | 2.3             | 56   | 22                |
| 0.1Pt-1Zn@H-ZSM-5  | 68                                         | 5.0             | 1.0                           | 30                            | 9.2                           | 2.8             | 53   | 36                |
| 0.3Pt-1Zn@H-ZSM-5  | 71                                         | 4.8             | 0.9                           | 30                            | 8.9                           | 2.6             | 53   | 38                |
| 0.5Pt-1Zn@H-ZSM-5  | 72                                         | 4.7             | 0.8                           | 30                            | 8.9                           | 2.4             | 53   | 38                |
| 0.7Pt-1Zn@H-ZSM-5  | 72                                         | 4.6             | 0.8                           | 30                            | 8.7                           | 2.4             | 54   | 39                |
| 1.0Pt-1Zn@H-ZSM-5  | 72                                         | 4.5             | 0.8                           | 31                            | 8.9                           | 2.4             | 52   | 38                |

Reaction condition:  $W_{\text{cat}} = 0.2$  g,  $F_{\text{C}_3\text{H}_8} = 10$  mL min<sup>-1</sup>,  $F_{\text{N}_2} = 10$  mL min<sup>-1</sup>,  $T = 550$  °C,  $P = 1$  bar,  $TOS = 10$  min.

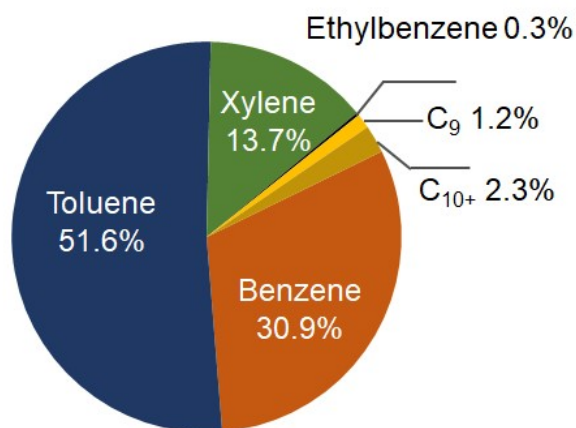

**Fig. S4.** Distribution of aromatic hydrocarbons over 0.7Pt-1Zn@H-ZSM-5. Reaction condition:  $W_{\text{cat}} = 0.2$  g,  $F_{\text{C}_3\text{H}_8} = 10$  mL min<sup>-1</sup>,  $F_{\text{N}_2} = 10$  mL min<sup>-1</sup>,  $T = 550$  °C,  $P = 1$  bar,  $TOS = 10$  min.

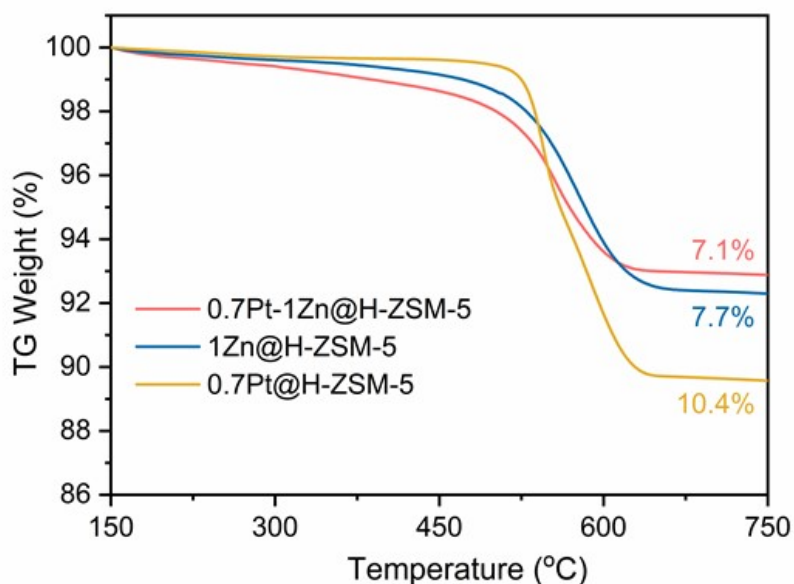

**Fig. S5.** TG analysis of 0.7Pt@H-ZSM-5, 1Zn@H-ZSM-5, and 0.7Pt-1Zn@H-ZSM-5 catalysts after reaction for 10 h. Compared with converted propane, about 0.2% of propane in weight percentage was converted into coke.

**Table S4** Textural properties of 1Zn@H-ZSM-5, 0.7Pt@H-ZSM-5, and 0.7Pt-1Zn@H-ZSM-5 catalysts after reaction for 10 h.

| Catalyst               | Si/Al <sup>a</sup><br>atomic ratio | S <sub>BET</sub> <sup>b</sup><br>(m <sup>2</sup> g <sup>-1</sup> ) | S <sub>micro</sub> <sup>c</sup><br>(m <sup>2</sup> g <sup>-1</sup> ) | V <sub>total</sub> <sup>d</sup><br>(cm <sup>3</sup> g <sup>-1</sup> ) | V <sub>micro</sub> <sup>e</sup><br>(cm <sup>3</sup> g <sup>-1</sup> ) |
|------------------------|------------------------------------|--------------------------------------------------------------------|----------------------------------------------------------------------|-----------------------------------------------------------------------|-----------------------------------------------------------------------|
| 1Zn@H-ZSM-5            | 15                                 | 338                                                                | 246                                                                  | 0.19                                                                  | 0.11                                                                  |
| 1Zn@H-ZSM-5-10 h       | 15                                 | 117                                                                | 84                                                                   | 0.08                                                                  | 0.04                                                                  |
| 0.7Pt@H-ZSM-5          | 15                                 | 323                                                                | 236                                                                  | 0.20                                                                  | 0.10                                                                  |
| 0.7Pt@H-ZSM-5-10 h     | 15                                 | 34                                                                 | 23                                                                   | 0.01                                                                  | 0.01                                                                  |
| 0.7Pt-1Zn@H-ZSM-5      | 15                                 | 313                                                                | 228                                                                  | 0.18                                                                  | 0.10                                                                  |
| 0.7Pt-1Zn@H-ZSM-5-10 h | 15                                 | 103                                                                | 80                                                                   | 0.07                                                                  | 0.04                                                                  |

<sup>a</sup> By X-ray fluorescence spectrometry

<sup>b</sup> BET method

<sup>c</sup> t-plot method

<sup>d</sup> Single point desorption total pore volume, P/P<sub>0</sub> = 0.99

<sup>e</sup> t-plot method

**Table S5** Acid densities of 1Zn@H-ZSM-5, 0.7Pt@H-ZSM-5, and 0.7Pt-1Zn@H-ZSM-5 catalysts after reaction for 10 h.

| Catalyst               | Si/Al<br>ratio | Acidity by NH <sub>3</sub> -TPD ( $\mu\text{mol g}^{-1}$ ) <sup>a</sup> |      |       |
|------------------------|----------------|-------------------------------------------------------------------------|------|-------|
|                        |                | Strong                                                                  | weak | total |
| 1Zn@H-ZSM-5            | 15             | 295                                                                     | 562  | 857   |
| 1Zn@H-ZSM-5-10 h       | 15             | 156                                                                     | 375  | 531   |
| 0.7Pt@H-ZSM-5          | 15             | 342                                                                     | 558  | 900   |
| 0.7Pt@H-ZSM-5-10 h     | 15             | 30                                                                      | 126  | 156   |
| 0.7Pt-1Zn@H-ZSM-5      | 15             | 311                                                                     | 563  | 874   |
| 0.7Pt-1Zn@H-ZSM-5-10 h | 15             | 167                                                                     | 362  | 529   |

<sup>a</sup> By deconvolution of NH<sub>3</sub>-TPD profiles

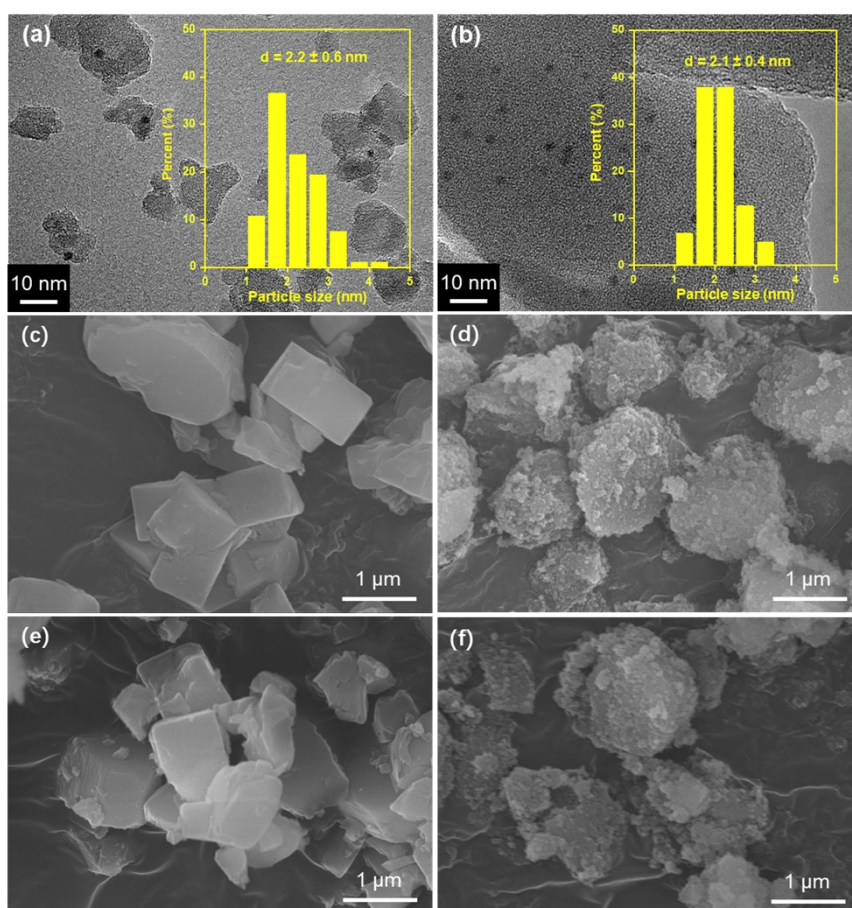

**Fig. S6.** TEM images of (a) 0.7Pt-1Zn/Al<sub>2</sub>O<sub>3</sub> and (b) 0.7Pt-1Zn@H-ZSM-5, the insets show the Pt-Zn nanoparticle size distribution. SEM images of (c) H-ZSM-5, (d) 0.7Pt-1Zn/Al<sub>2</sub>O<sub>3</sub>/H-ZSM-5, (e) 0.7Pt-1Zn@H-ZSM-5, and (f) 0.7Pt-1Zn@H-ZSM-5/Al<sub>2</sub>O<sub>3</sub>.

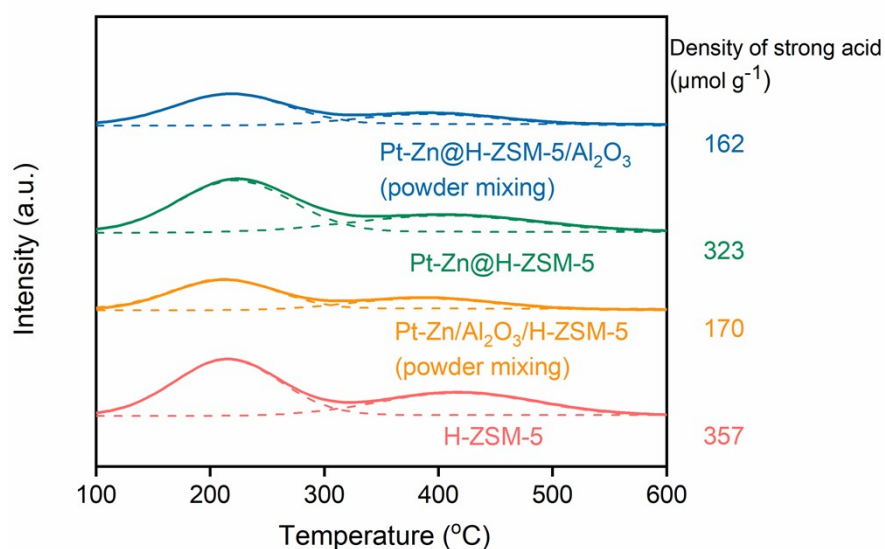

**Fig. S7.** NH<sub>3</sub>-TPD profiles of different samples. The density of strong acid evaluated from the high-temperature peak was normalized to zeolite weight and displayed in the figure.

**Table S6** Pt loading and Zn loading of samples.

| Samples                                       | Pt loading (wt%) <sup>a</sup> | Zn loading (wt%) <sup>a</sup> |
|-----------------------------------------------|-------------------------------|-------------------------------|
| Pt-Zn/Al <sub>2</sub> O <sub>3</sub>          | 0.69                          | 1.15                          |
| Pt-Zn/Al <sub>2</sub> O <sub>3</sub> /H-ZSM-5 | 0.32                          | 0.61                          |
| Pt-Zn@H-ZSM-5                                 | 0.74                          | 1.13                          |
| Pt-Zn@H-ZSM-5/Al <sub>2</sub> O <sub>3</sub>  | 0.35                          | 0.58                          |

<sup>a</sup> By inductive coupled plasma-atomic emission spectrometer (ICP-AES)



**Table S7** The effect of contact time over catalysts with different spatial distances between functional sites.

| Spatial distance | Contact time (s) | C <sub>3</sub> H <sub>8</sub> conv. (%) | Selectivity (%) |                               |                               |                               |                 | Aro. yield (%) |    |
|------------------|------------------|-----------------------------------------|-----------------|-------------------------------|-------------------------------|-------------------------------|-----------------|----------------|----|
|                  |                  |                                         | CH <sub>4</sub> | C <sub>2</sub> H <sub>4</sub> | C <sub>2</sub> H <sub>6</sub> | C <sub>3</sub> H <sub>6</sub> | C <sub>4+</sub> |                |    |
| millimeter scale | 1.2              | 42                                      | 24              | 13                            | 14                            | 11                            | 6.4             | 32             | 13 |
| micrometer scale | 1.2              | 41                                      | 20              | 12                            | 14                            | 8.8                           | 3.6             | 42             | 17 |
| nanometer scale  | 1.2              | 42                                      | 15              | 8.1                           | 16                            | 8.2                           | 2.7             | 50             | 21 |
| atom scale       | 1.2              | 74                                      | 4.7             | 0.7                           | 29                            | 7.5                           | 2.0             | 56             | 41 |
| millimeter scale | 2.4              | 45                                      | 27              | 14                            | 16                            | 10                            | 8.0             | 25             | 11 |
| micrometer scale | 2.4              | 46                                      | 25              | 13                            | 19                            | 8.8                           | 3.2             | 31             | 14 |
| nanometer scale  | 2.4              | 44                                      | 16              | 7.6                           | 22                            | 8.3                           | 3.1             | 43             | 19 |
| atom scale       | 2.4              | 81                                      | 5.8             | 0.8                           | 32                            | 5.5                           | 1.5             | 55             | 45 |

Reaction condition:  $W_{\text{(cat)}} = 0.4$  g,  $F_{\text{(C}_3\text{H}_8)} = 10$  or  $5$  mL min<sup>-1</sup>,  $F_{\text{(N}_2)} = 10$  or  $5$  mL min<sup>-1</sup>,  $T = 550$  °C,  $P = 1$  bar,  $TOS = 10$  min.
